# Supplementary material for: Combination of laser-generated silicon NPs and electrospun-nanofibres for the development of new-generation bioactive wound dressings
Source: Royal Society of Chemistry journal article supplement (doi:10.1039/d5ra09481j), 2026-01-01
Supplement: d5ra09481j1.pdf [file d5ra09481j1.pdf]

**Combination of laser-generated Silicon nanoparticles and electrospun-nanofibers for the development of new-generation bioactive wound dressings**

Romain Scarabelli<sup>1,2</sup>, Magali Gary-Bobo<sup>3</sup>, Christophe Nguyen<sup>3</sup>, Denis Durand<sup>3</sup>, Jérôme Esvan<sup>2</sup>, Maëlen Aufray<sup>2</sup>, Christophe Drouet<sup>2</sup>, Ahmed Al-Kattan<sup>1\*</sup>

*1- LP3, Aix Marseille Université, CNRS, UMR 7341, Campus de Luminy, Case 917, 13288, Marseille, France*

*2- CIRIMAT, Université de Toulouse/INP/CNRS, 4 allée Emile Monso, 31030 Toulouse, France*

*3- IBMM, Université de Montpellier, CNRS, ENSCM, 1919 Route de Mende, 34293 Montpellier, France*

*Corresponding author: [ahmed.al-kattan@univ-amu.fr](mailto:ahmed.al-kattan@univ-amu.fr)*

## Supplementary Information

## Production and characterization of PCL nanofibers

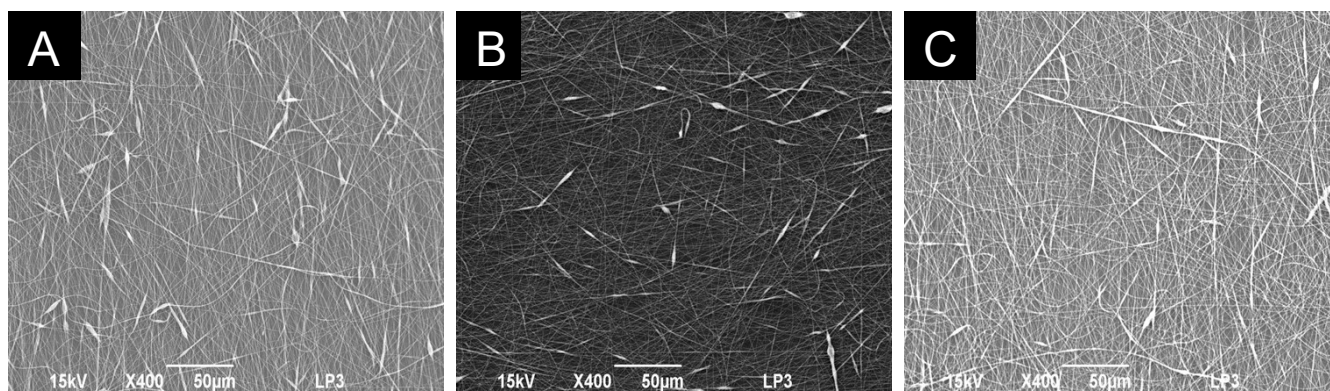

Figure S1: SEM micrographs for various electrospinning parameters during the optimization process. (A): 10 kV 13.75 cm; (B): 13.5 kV 18 cm; (C): 20 kV 14.25 cm

## Production and characterization of laser-synthesized Silicon NPs

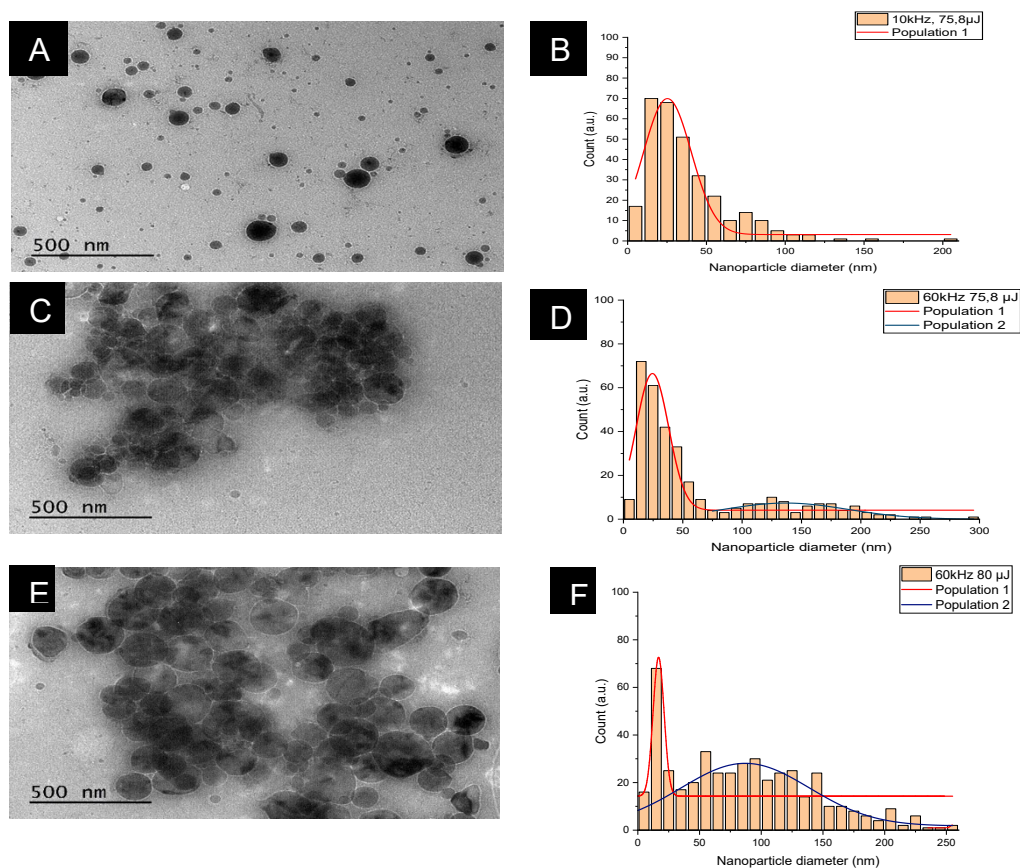

Figure S2: Size distributions and TEM analysis of Si-NPs produced via laser ablation in water. (A): TEM photograph of Si-NPs obtained with 10 kHz, 75.8  $\mu$ J; (B): Size distribution of Si-NPs obtained with 10 kHz, 75.8  $\mu$ J; (C): TEM photograph of Si-NPs obtained with 60 kHz, 75.8  $\mu$ J; (D): Size distribution of Si-NPs obtained with 60 kHz, 75.8  $\mu$ J; (E): TEM photograph of Si-NPs obtained with 60 kHz, 80  $\mu$ J; (F): Size distribution of Si-NPs obtained with 60 kHz, 80  $\mu$ J;

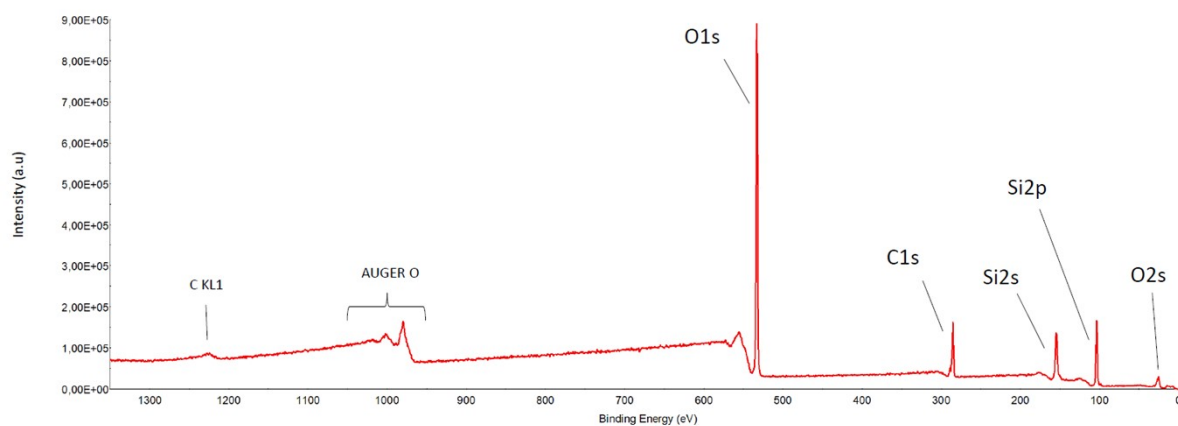

Figure S3: XPS survey of the SiNPs

## Production and characterization of hybrid NPs/NFs combinations

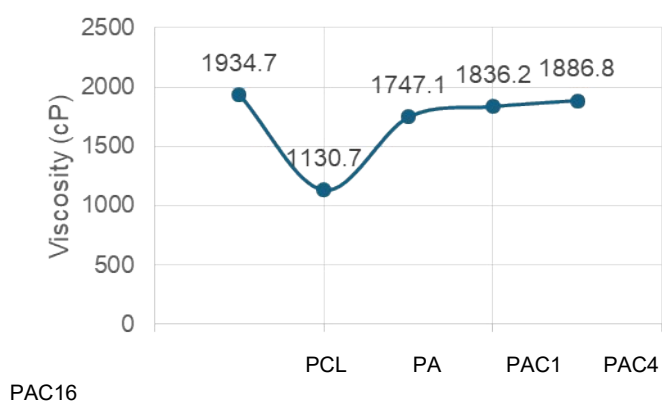

Figure S4: Rheology values of polymer solutions (pre-electrospinning) of all formulations

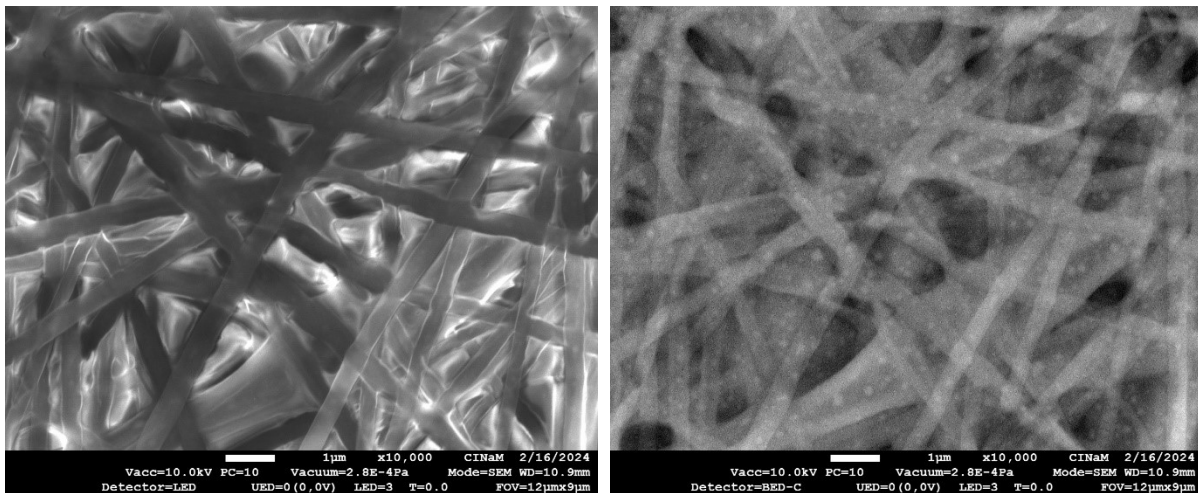

Figure S5: Comparison between LED and BED-C imaging for the detection of SiNPs in a PAC4 sample.

## Cytocompatibility evaluation of the PCL-APTES-SiNPs formulations using C2C12 cells

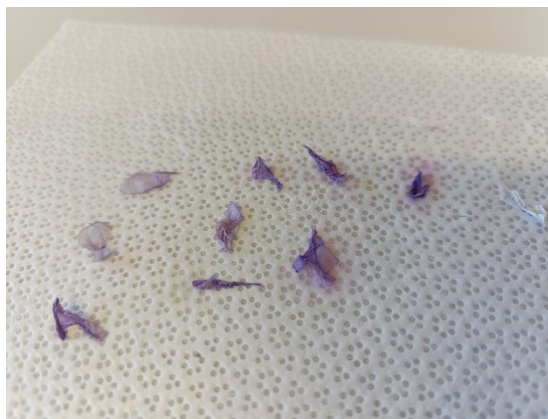

Figure S6: Photograph of NF samples after a direct MTT assay. Membranes were washed and triturated multiple times with isopropanol.
